# Supplementary material for: CEBPD is a master transcriptional factor for hypoxia regulated proteins in glioblastoma and augments hypoxia induced invasion through extracellular matrix-integrin mediated EGFR/PI3K pathway
Source: PubMed Central journal article supplement (PMC10104878; doi:10.1038/s41419-023-05788-y), 2023-04-14
Supplement: 41419_2023_5788_MOESM6_ESM.pdf [file 41419_2023_5788_MOESM6_ESM.pdf]

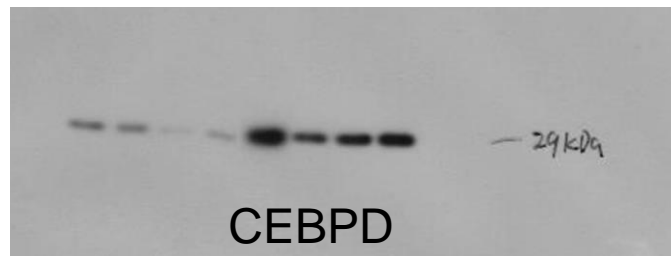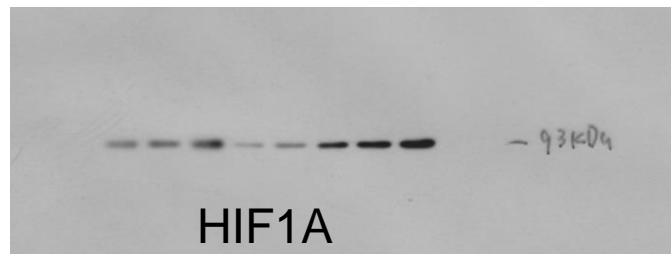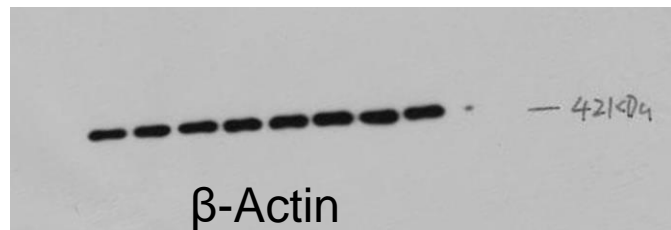

Fig. 2C

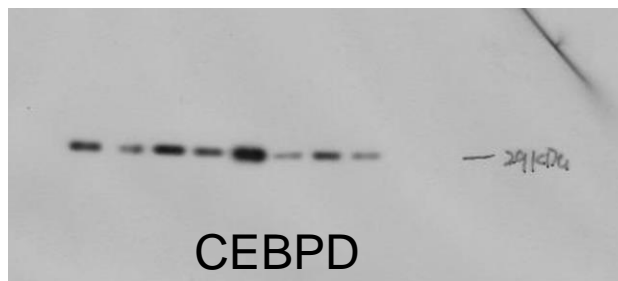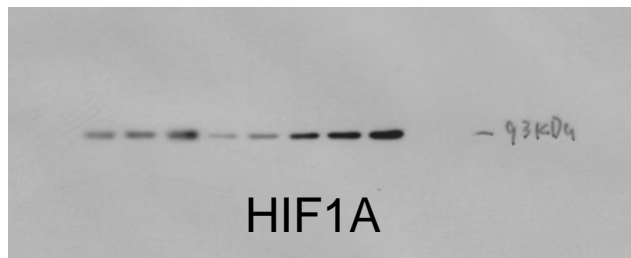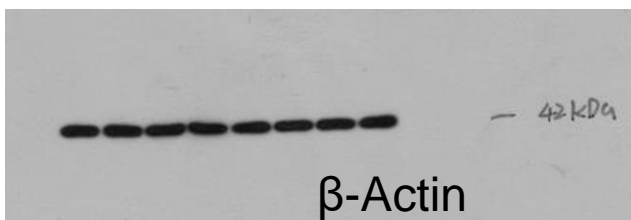

Fig. 2G

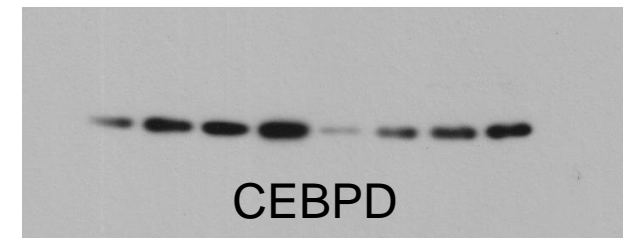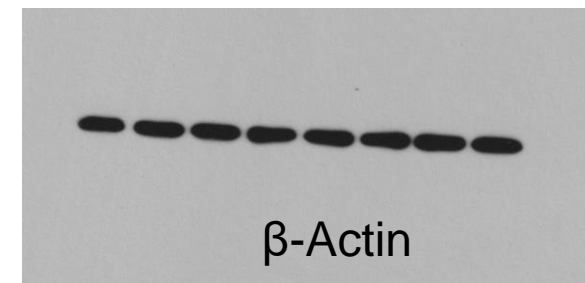

Fig. 2J

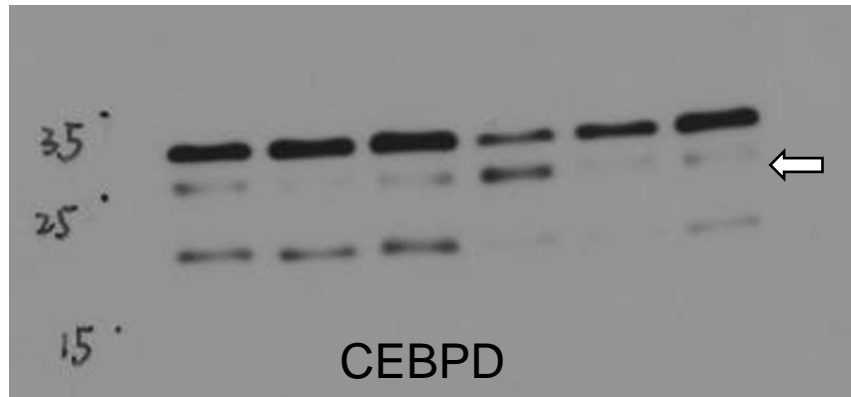

Fig. 3A, U87

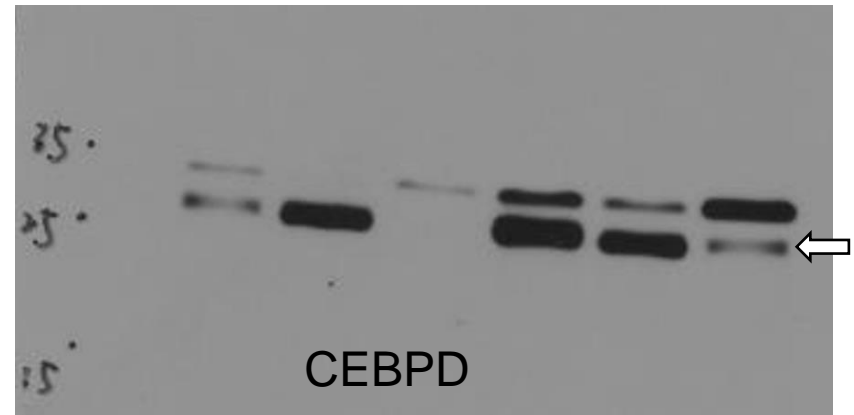

Fig. 3A, U251

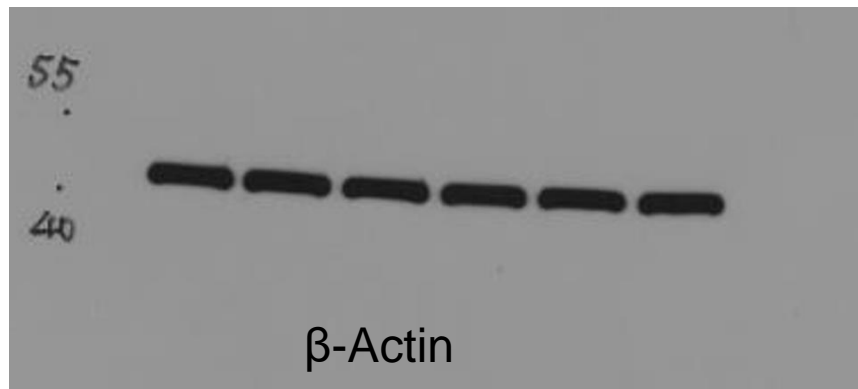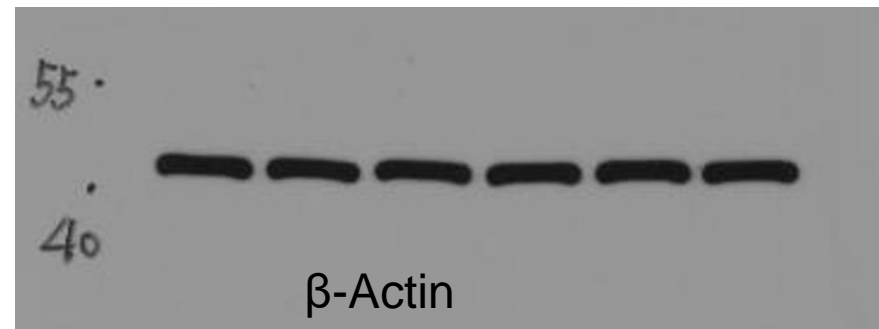

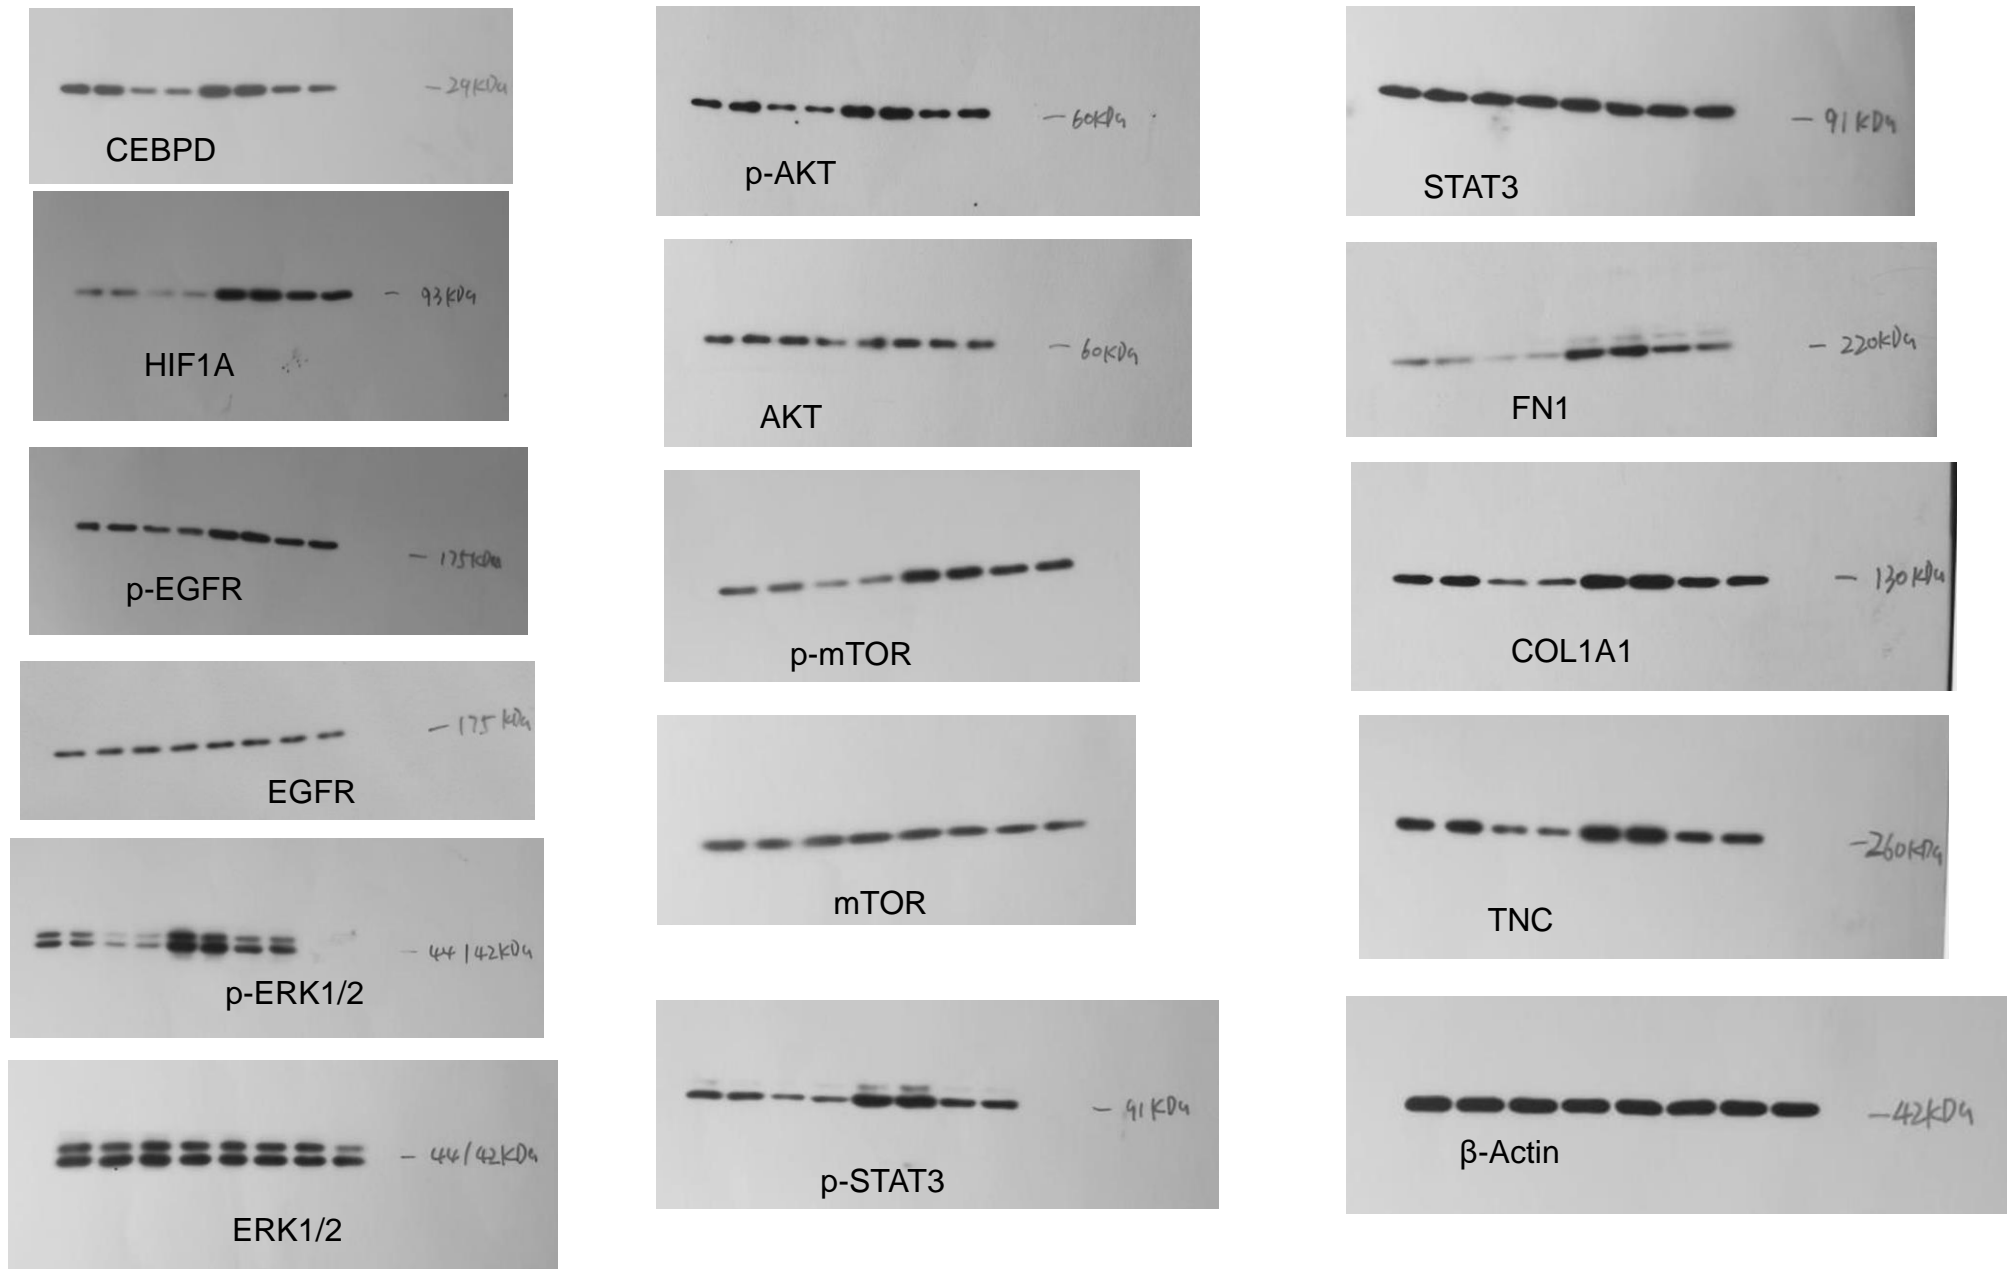

Fig. 6A

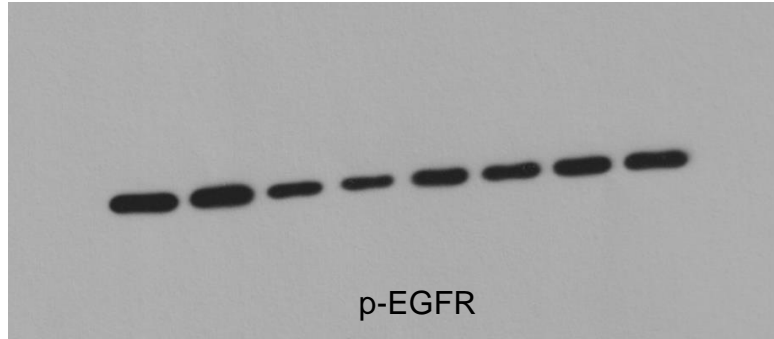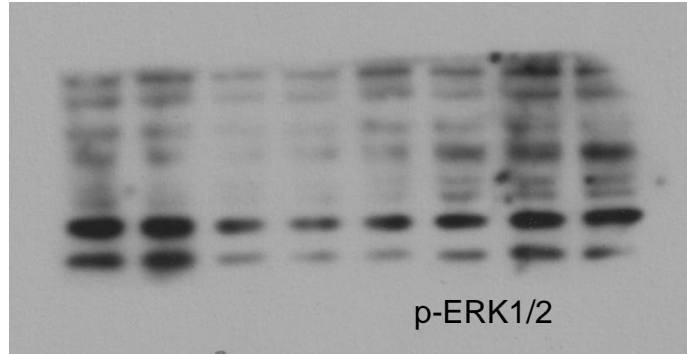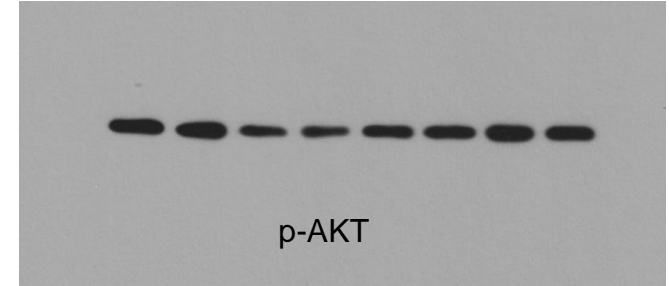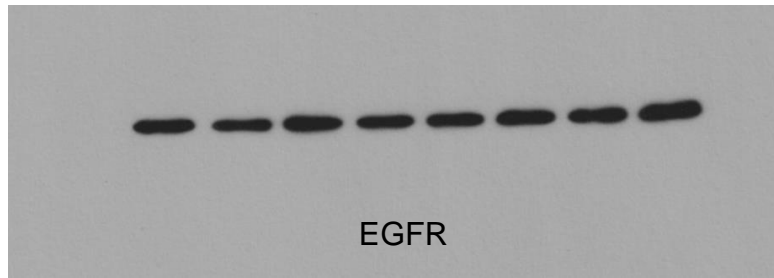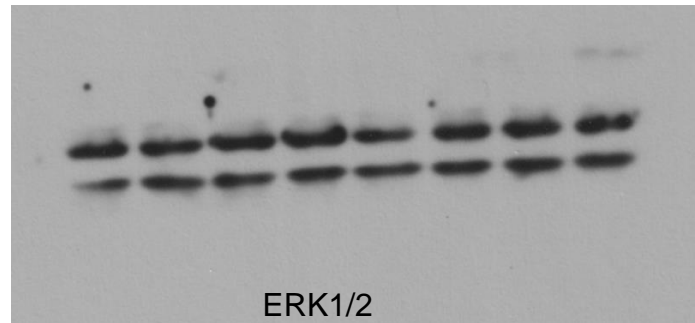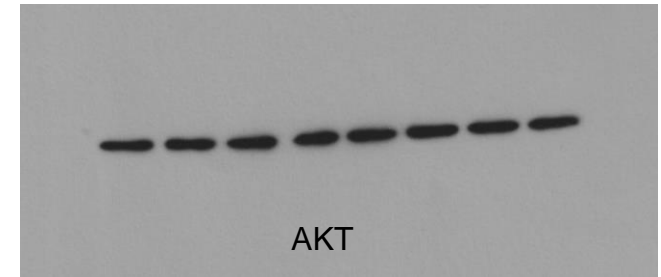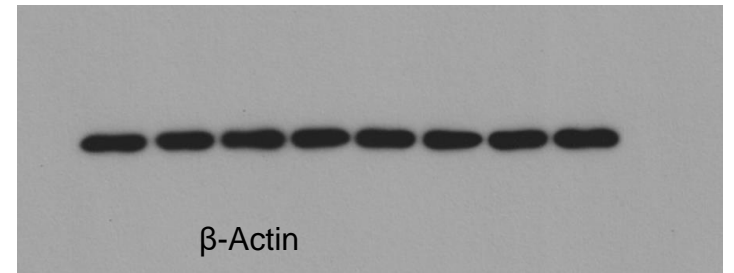

Fig. 6I
